# Supplementary material
Source: publisher site journal article supplement (https://www.spandidos-publications.com/6773/downloadSupplementary)
Supplement: Supplementary file 1 [file downloadSupplementary]

## Sheet: Supplementary_Table_SIX
Table SIX. Enriched pathways of the significant genes related to Streptococcus and cervical adenocarcinoma from weighted gene coexpression network analysis.
Term	Source	Adjusted P-value	Genes
Synaptic vesicle cycle	KEGG	4.35e-07	ATP6V1H, SLC6A5, SLC17A6, SLC18A3, SLC6A13, SLC17A7, CPLX2, SLC6A2, ATP6V1C1
Neuroactive ligand-receptor interaction	KEGG	8.98e-10	LPAR4, GIP, AVP, POMC, SSTR3, TAAR5, CRH, GRIA3, GRIN2B, ADCYAP1R1, GRIA4, GRID2, CHRND, RXFP1, CHRM5, GRIK1, CCKAR, MCHR2, PENK, GABRR1
Olfactory transduction	KEGG	1.43e-09	OR8G5, OR4D9, OR6K3, OR1K1, OR1A1, OR4Q3, OR8D4, OR1D2, OR11A1 ,OR4X1, OR2AT4, OR7C2, OR7E24, OR10V1, NCALD, OR56A3, OR52K1, OR2C1, OR5T2 ,OR2B3, OR11H6
Transcriptional misregulation in cancer	KEGG	8.41e-06	RXRG, HOXA9, HOXA11, HOXA10, GRIA3, SSX1, DEFA5, DEFA6, NGFR, MYCN, CCNA1
PI3K-Akt signaling pathway	KEGG	1.6e-05	FGF16, LPAR4, GNG4, EREG, FGF23, THBS4, NTRK2, FGF17, LAMB4, CCND1, FGF4, FGF19, FGF3, NGFR
Calcium signaling pathway	KEGG	7.38e-05	FGF16, FGF23, NTRK2, FGF17, GRIN2B, CASQ1, FGF4, FGF19, FGF3, CHRM5, CCKAR
Ras signaling pathway	KEGG	0.000228205	FGF16, GNG4, FGF23, NTRK2, FGF17, GRIN2B, FGF4, FGF19, FGF3, NGFR
Pathways in cancer	KEGG	0.000228205	FGF16, RXRG, LPAR4, GNG4, WNT8A, FGF23, FGF17, LAMB4, ESR2, CCND1, WNT9B, FGF4, FGF19, FGF3, CCNA1
MAPK signaling pathway	KEGG	0.00029692	FGF16, EREG, FGF23, NTRK2, FGF17, STK3, FGF4, FGF19, FGF3, NGFR, LAMTOR3
PPAR signaling pathway	KEGG	0.000304995	RXRG, ADIPOQ, APOA1, FABP7, UCP1, SLC27A6
Rap1 signaling pathway	KEGG	0.000408719	FGF16, LPAR4, FGF23, FGF17, GRIN2B, FGF4, FGF19, FGF3, NGFR
cAMP signaling pathway	KEGG	0.000586037	GIP, POMC, CRH, GRIA3, GRIN2B, ADCYAP1R1, GRIA4, ATP1A2, FXYD1
Human papillomavirus infection	KEGG	0.00194641	ATP6V1H, CHD4, WNT8A, THBS4, LAMB4, CCND1, WNT9B, ATP6V1C1, CCNA1, HES2
Chemical carcinogenesis - receptor activation	KEGG	0.00736722	FGF16, RXRG, FGF17, ESR2, CCND1, FGF4, FGF3
Metabolic pathways	KEGG	0.00957207	ATP6V1H, B4GALNT1, CKM, B3GALT1, GCSH, CA7, TYR, TPH1, GPX5, FUT9, CERS1, TYRP1, DGKK, MGAT4C, ALPG, COX8C, ATP6V1C1, MTMR7, IDH1, KMO, KMT5B, CHKA, TMLHE
Cytokine-cytokine receptor interaction	KEGG	0.0101866	GDF2, CNTFR, IL31, IL36G, THPO, XCL1, AMHR2, NGFR
Focal adhesion	KEGG	0.0234119	MYL10, FYN, THBS4, PARVG, LAMB4, CCND1
Cell adhesion molecules	KEGG	0.0304633	SDC2, NCAM1, IGSF11, CLDN5, CADM1
mTOR signaling pathway	KEGG	0.0314311	ATP6V1H, WNT8A, WNT9B, ATP6V1C1, LAMTOR3
TGF-beta signaling pathway	KEGG	0.0417601	IGSF1, NOG, FST, AMHR2
Tight junction	KEGG	0.0438942	CLDN5, PRKAG3, CCND1, TUBA3E, TUBA3C
AMPK signaling pathway	KEGG	0.0578782	ADIPOQ, PRKAG3, CCND1, CCNA1
Signaling pathways regulating pluripotency of stem cells	KEGG	0.0856038	WNT8A, POU5F1B, WNT9B, HAND1
Phospholipase D signaling pathway	KEGG	0.0904642	LPAR4, FYN, AVP, DGKK
AMPK, AMP-activated protein kinase; KEGG, Kyoto Encyclopedia of Genes and Genomes; PPAR, peroxisome proliferator-activated receptor.
